# Supplementary material for: Filament Compliance Influences Cooperative Activation of Thin Filaments and the Dynamics of Force Production in Skeletal Muscle
Source: PLOS journal article supplement (doi:10.1371/journal.pcbi.1002506), 2012-05-10
Supplement: S2 (10.1371/journal.pcbi.1002506.s002) [file journal.pcbi.1002506.s002]

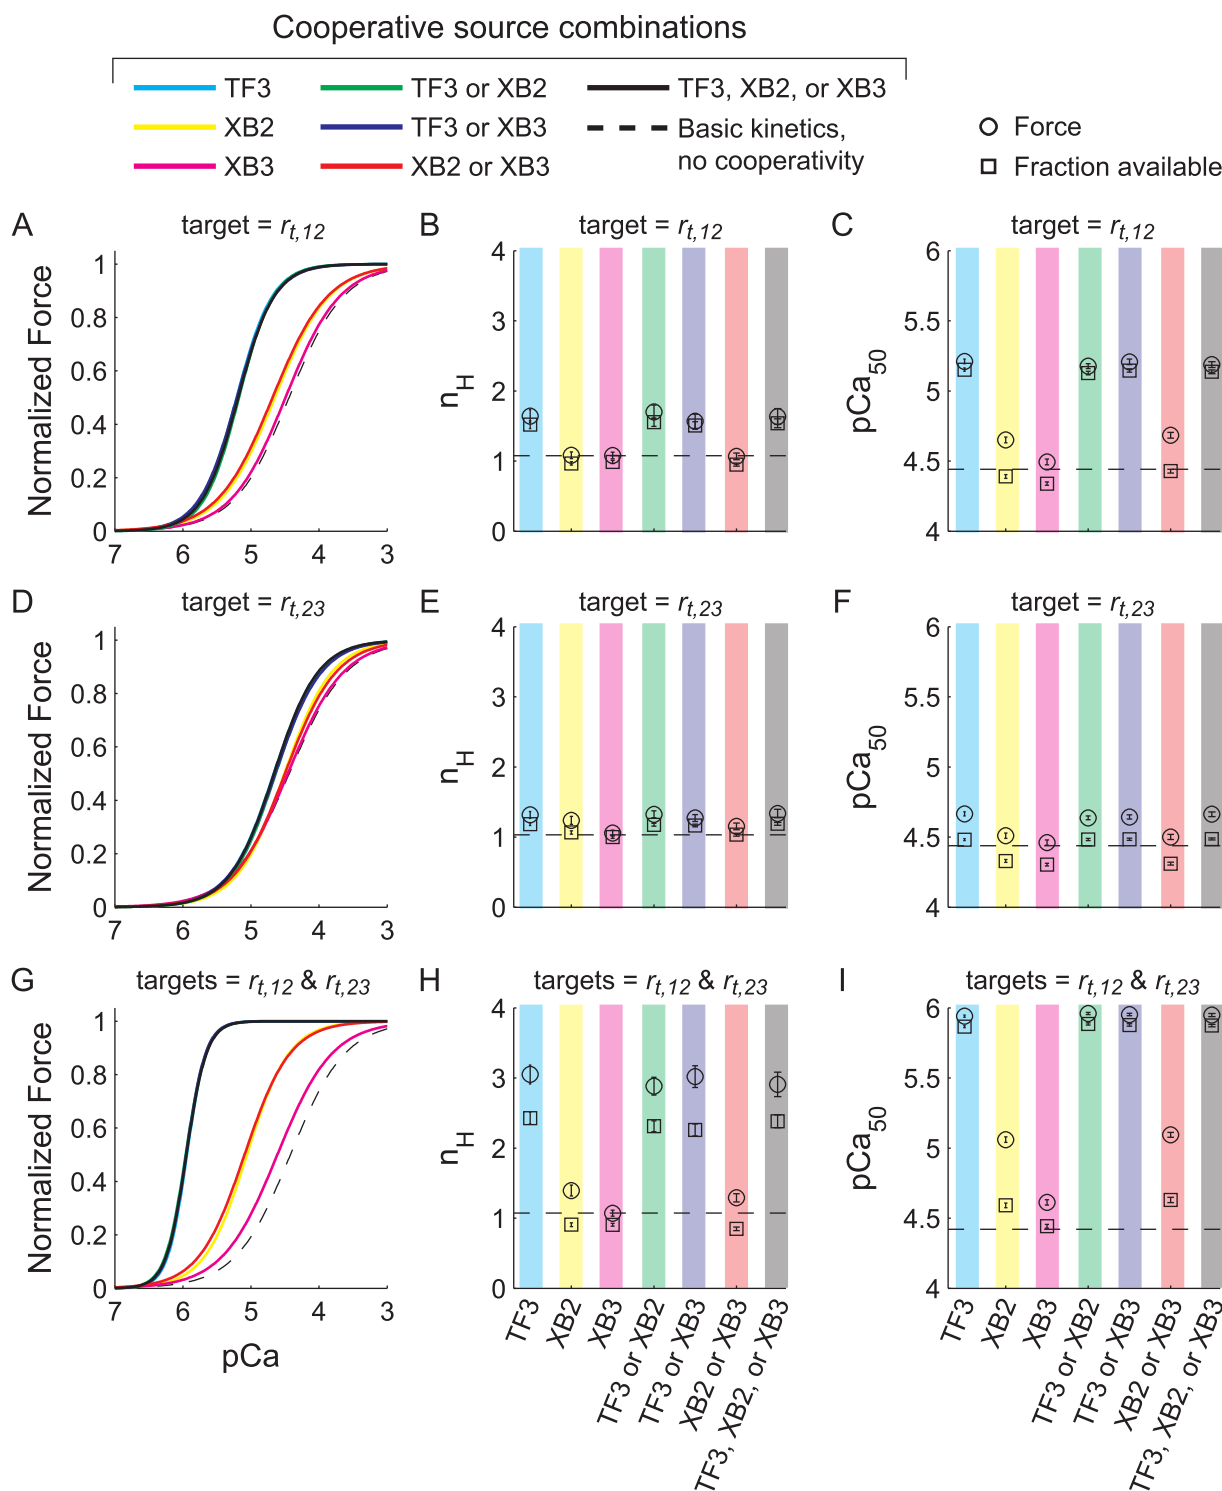

**Figure S2: Multiple cooperative pathways combine to produce the physiological force-pCa relationship.** Force and fractional thin filament activation are illustrated for all combinations of kinetic cooperativity. (A) Lines show 3-parameter Hill fits to steady-state force-pCa responses for  $r_{t,12}$  being targeted independently, along with symbols depicting  $n_H$  (B) and  $pCa_{50}$  (C) values from fits to both force-pCa and fraction available-pCa relationships. Comparable results are shown for  $r_{t,23}$  being targeted independently (D-F), or  $r_{t,12}$  and  $r_{t,23}$  being targeted in combination (G-I). Dashed lines illustrate simulation results without cooperative kinetics. Error bars represent 95% confidence intervals for  $n_H$  and  $pCa_{50}$ . Simulations used standard parameter values:  $k_{xb}=3$  pN nm<sup>-1</sup>,  $k_{fil}=k_m=k_a=1X$ , and  $RU_{span}=9$  actins.
