# Supplementary material for: Filament Compliance Influences Cooperative Activation of Thin Filaments and the Dynamics of Force Production in Skeletal Muscle
Source: PLOS journal article supplement (doi:10.1371/journal.pcbi.1002506), 2012-05-10
Supplement: S4 (10.1371/journal.pcbi.1002506.s004) [file journal.pcbi.1002506.s004]

TF3, XB2, or XB3 as cooperative sources  
 (i.e. RU-RU, XB-RU, and XB-XB cooperativity)

 Only TF3 as a cooperative source  
 (i.e. RU-RU and XB-XB cooperativity)
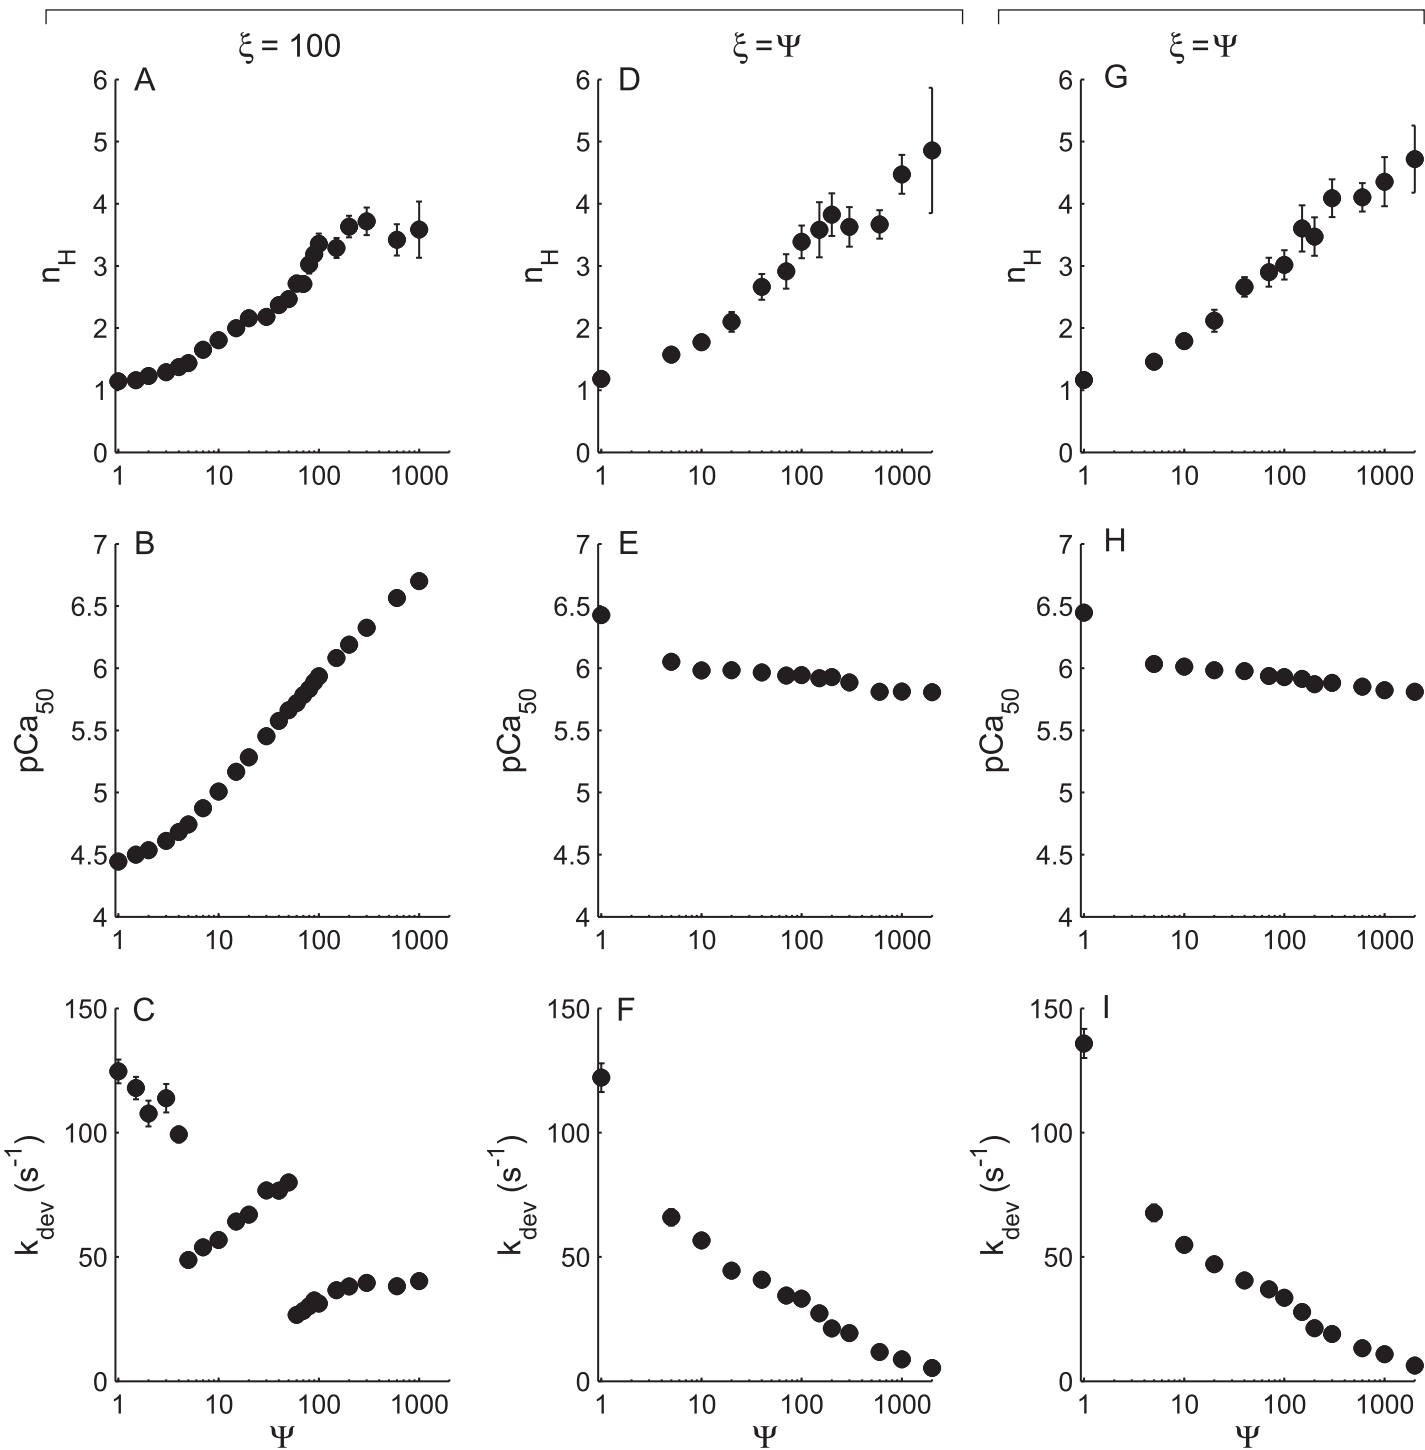

**Figure S4: Model sensitivities to cooperative parameters  $\Psi$  and  $\xi$ .** Values from 3 parameter Hill fits to steady-state force-pCa relationships demonstrate the influence of  $\Psi$  and  $\xi$  on cooperativity ( $n_H$ , top panels),  $\text{Ca}^{2+}$  sensitivity ( $p\text{Ca}_{50}$ , middle panels), and the maximal rate of force development ( $k_{\text{dev}}$ , bottom panels). All possible forms of cooperativity were implemented as  $\Psi$  varied from 1 to 1000, with  $\xi$  fixed at 100 (A-C). All possible forms of cooperativity were implemented as  $\Psi$  varied from 1 to 2000, with  $\xi = \Psi$  for each simulation (D-F). RU-RU and XB-XB cooperativity were implemented as  $\Psi$  varied from 1 to 2000, with  $\xi = \Psi$  for each simulation (G-I). Simulations used standard parameter values:  $k_{xb} = 3 \text{ pN nm}^{-1}$ ,  $k_{fil} = k_m = k_a = 1X$ , and  $RU_{span} = 9$  actins. Error bars represent 95% confidence intervals for  $n_H$  and  $p\text{Ca}_{50}$ , and SE for  $k_{\text{dev}}$ .
